# Supplementary material for: Lactate metabolism-related genes to predict the clinical outcome and molecular characteristics of endometrial cancer
Source: PubMed Central journal article supplement (PMC10230708; doi:10.1186/s12885-023-10934-y), 2023-05-31
Supplement: 12885_2023_10934_MOESM1_ESM.pdf [file 12885_2023_10934_MOESM1_ESM.pdf]

# 1 Supplement Figure 1

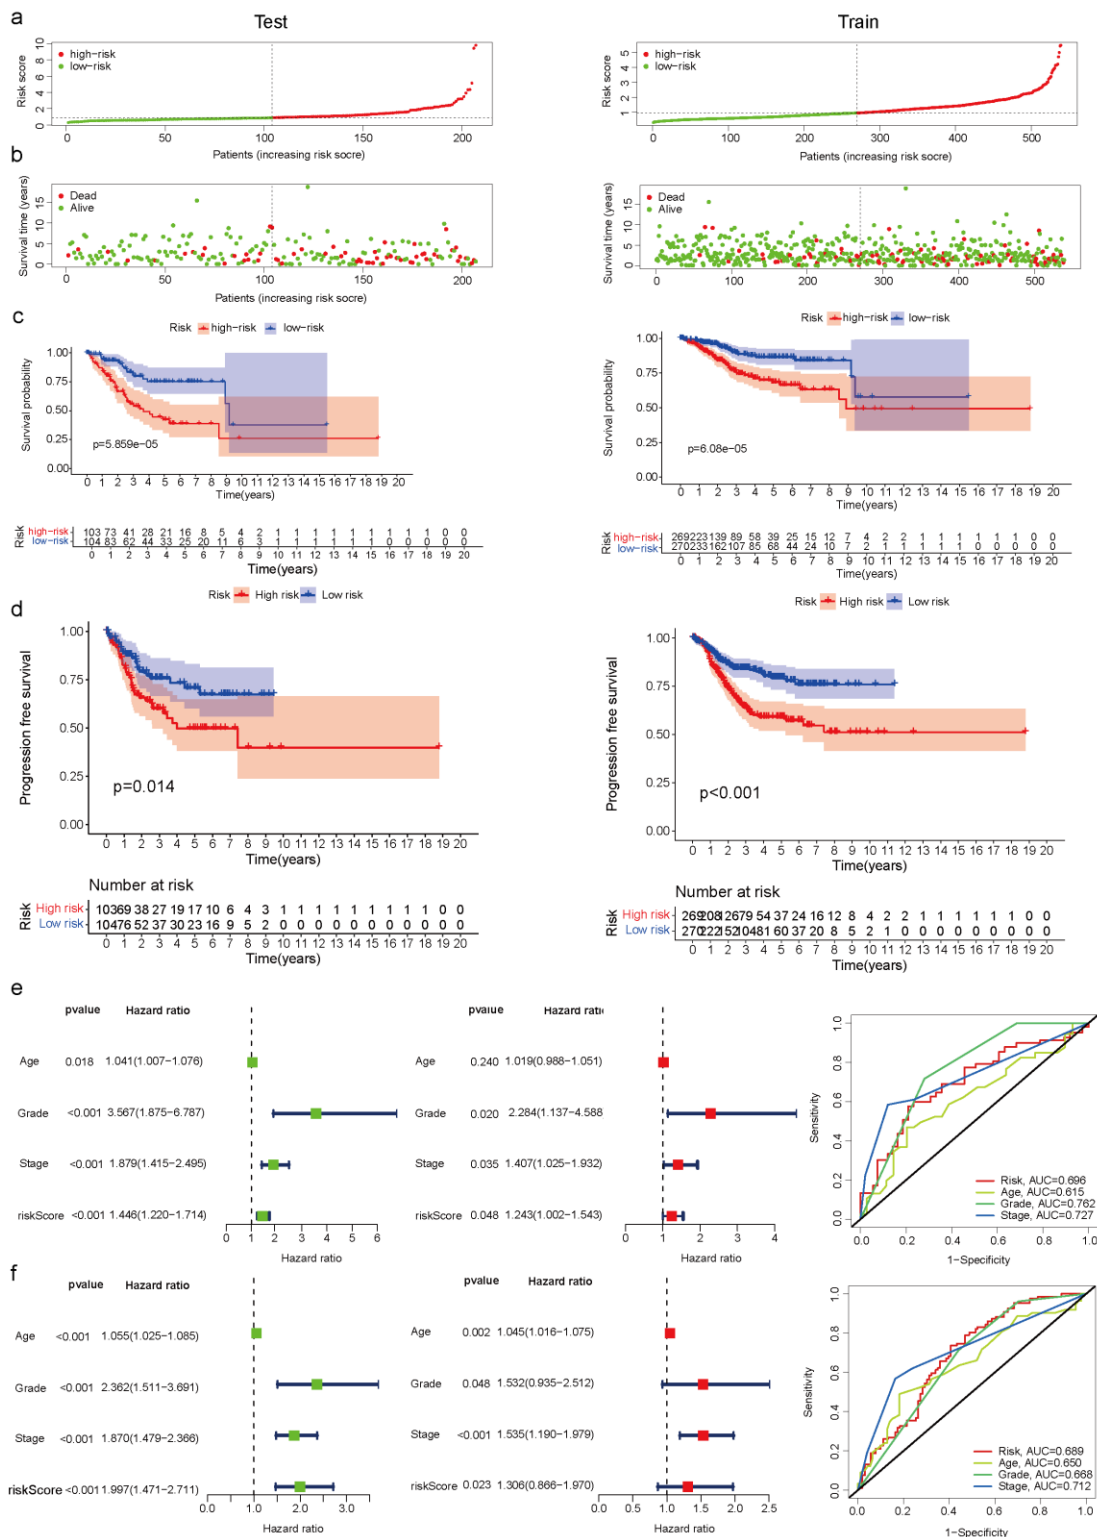

2

3 Prognosis value of LMRGs in the test and train set. a, b Risk score distribution and

4 survival status of EC samples based on the risk score of the test and train sets. c, d The

5 Kaplan–Meier survival curves of OS and PFS according to high-and low-risk groups in

6 patients with EC of the test and train sets. e The univariate Cox regression and  
7 multivariate analysis of age, grade, stage, and risk score for OS and ROC curve of the  
8 test set. f The univariate Cox regression and multivariate analysis of age, grade, stage,  
9 and risk score for OS and ROC curve of the train set.

10
