# Supplementary material for: Lactate metabolism-related genes to predict the clinical outcome and molecular characteristics of endometrial cancer
Source: PubMed Central journal article supplement (PMC10230708; doi:10.1186/s12885-023-10934-y), 2023-05-31

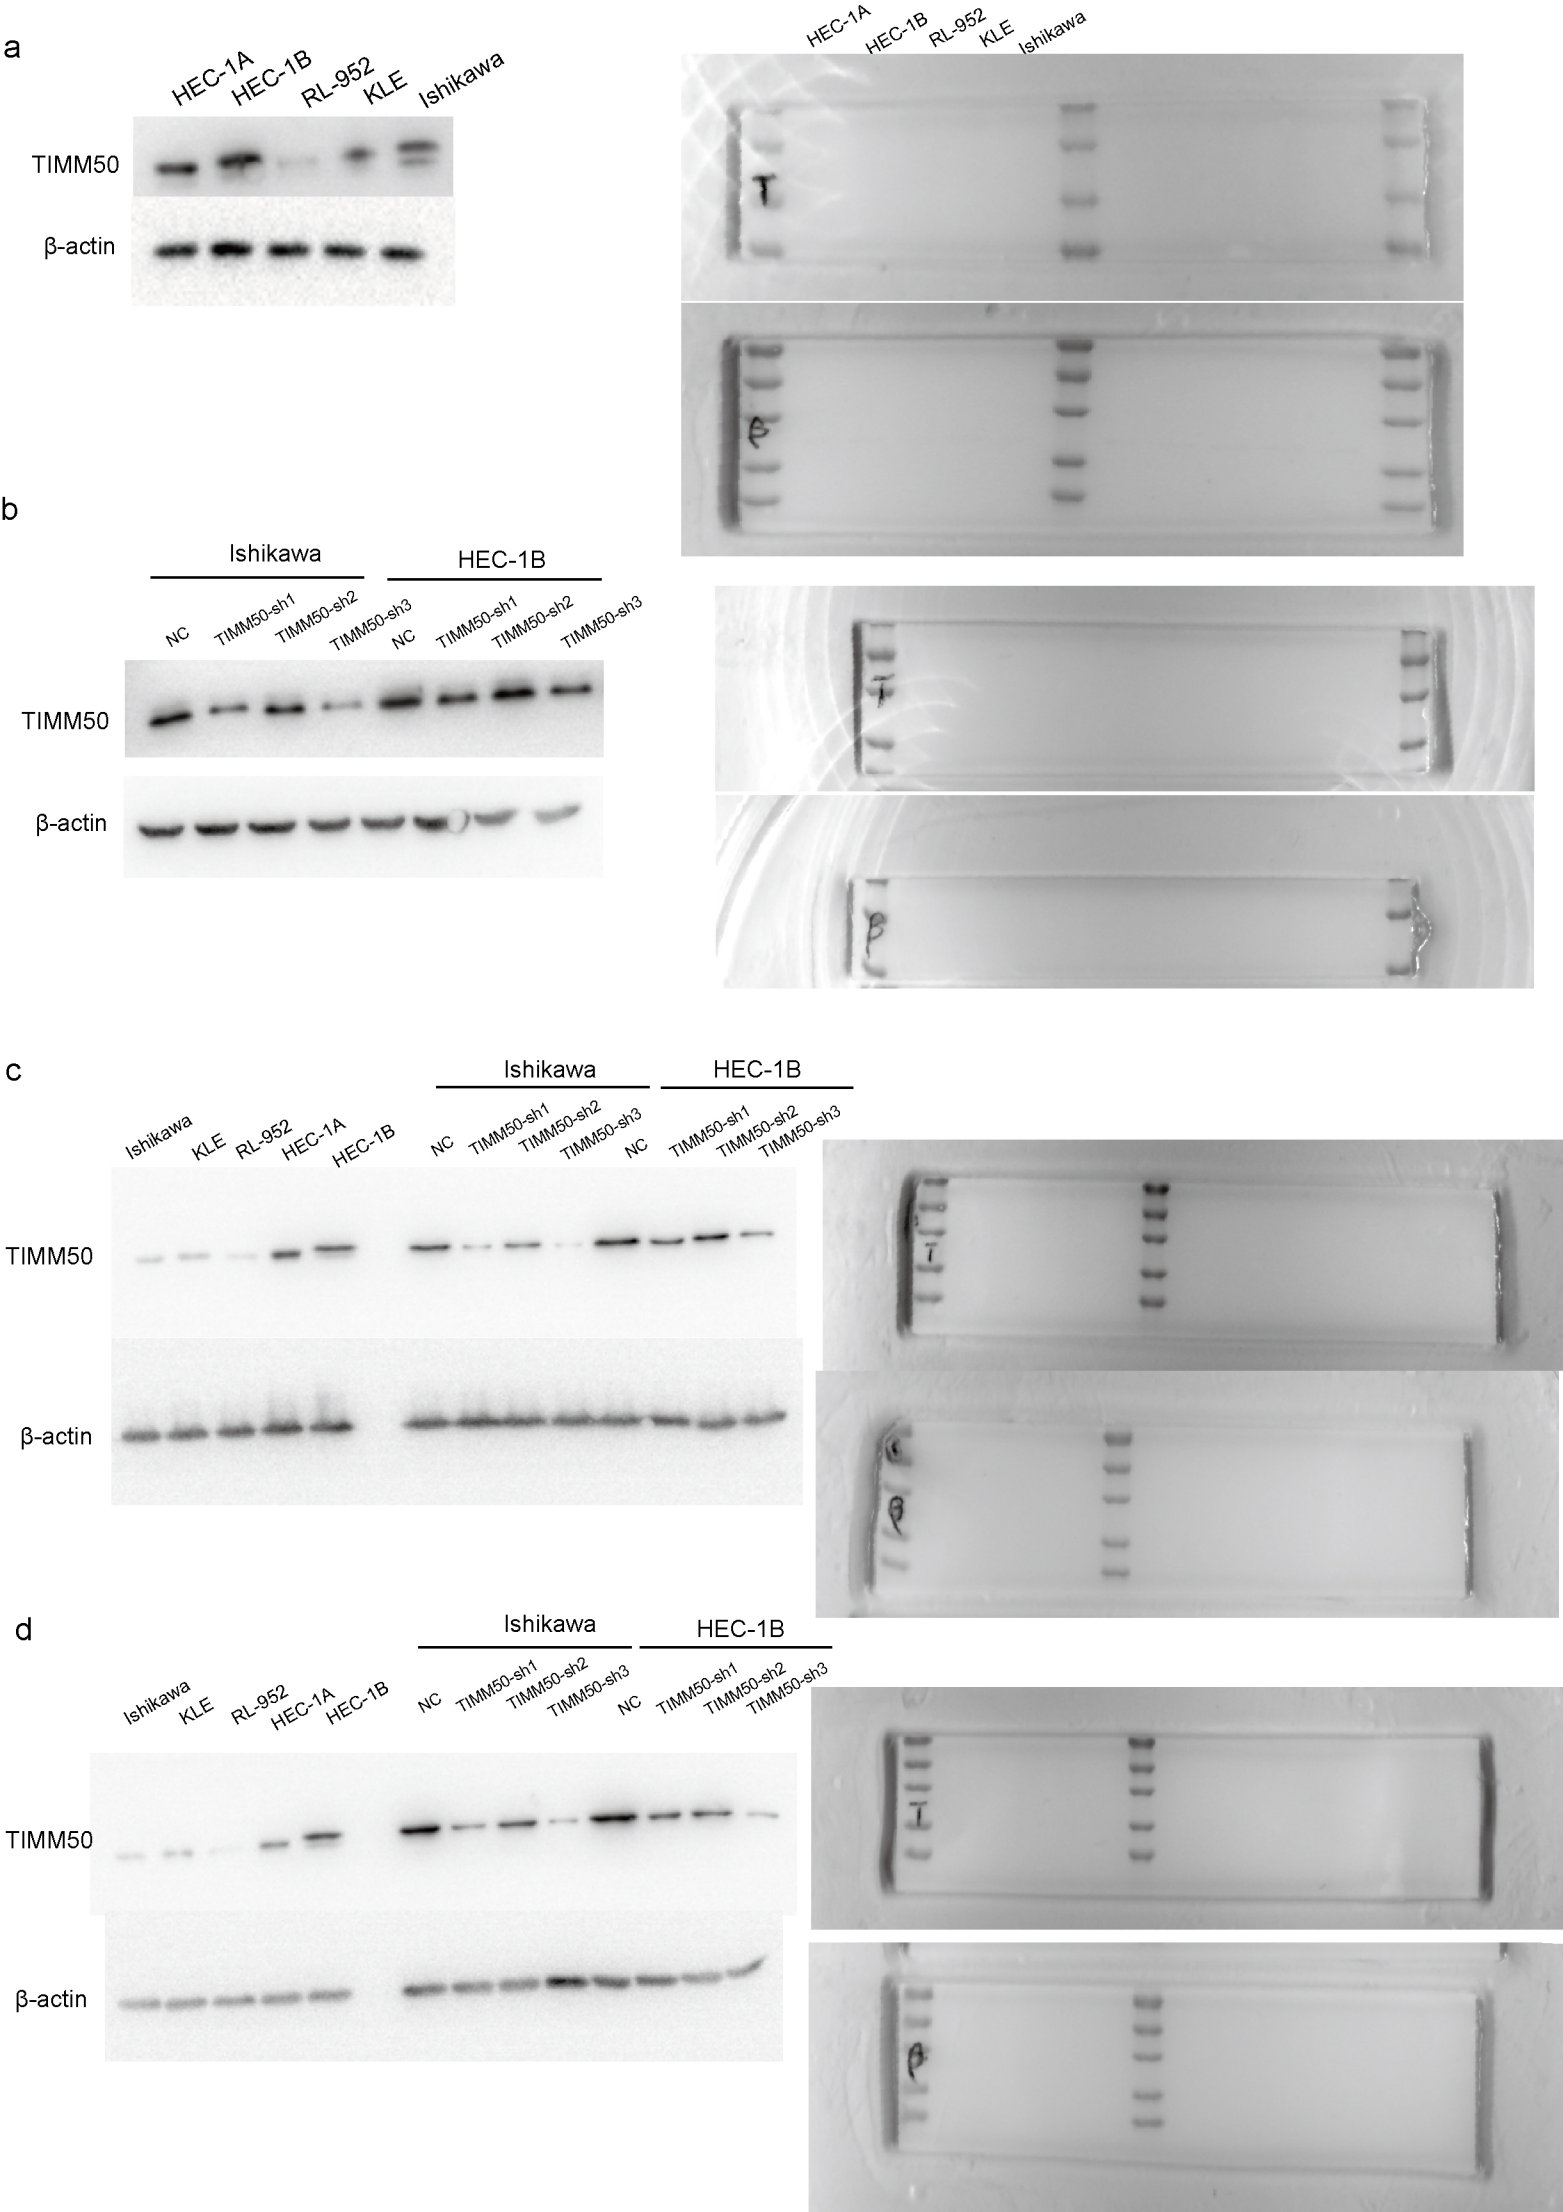

Supplement: 12885_2023_10934_MOESM3_ESM.pdf [file 12885_2023_10934_MOESM3_ESM.pdf]
